# Supplementary material for: Coordination of a bis-histidine-oligopeptide to Re(i) and Ga(iii) in aqueous solution
Source: Royal Society of Chemistry journal article supplement (doi:10.1039/c9dt02406a), 2019-01-01
Supplement: c9dt02406a1.pdf [file c9dt02406a1.pdf]

## Supplementary Informations

Table S1. pHis2 proton chemical shifts (ppm) in H<sub>2</sub>O at 298 K.

|               | NH   | $\alpha$ CH | $\beta$ CH | Others                                                                                |
|---------------|------|-------------|------------|---------------------------------------------------------------------------------------|
| His1          | -    | 4.07        | 3.22       | C2 8.51; C4 7.28                                                                      |
| Lys2          | -    | 3.81        | 1.72       | NHsc 8.14 $\epsilon$ 3.10<br>$\gamma$ $\delta$ 1.35 1.20                              |
| $\beta$ -Ala3 | 8.22 | 2.46        | 3.40       |                                                                                       |
| Lys4          | 8.08 | 4.08        | 1.61       | NHsc 8.14 NH <sub>2</sub> t 7.52, 7.00<br>$\epsilon$ 3.10 $\gamma$ $\delta$ 1.35 1.20 |
| His5          | -    | 4.07        | 3.22       | C2 8.51; C4 7.28                                                                      |

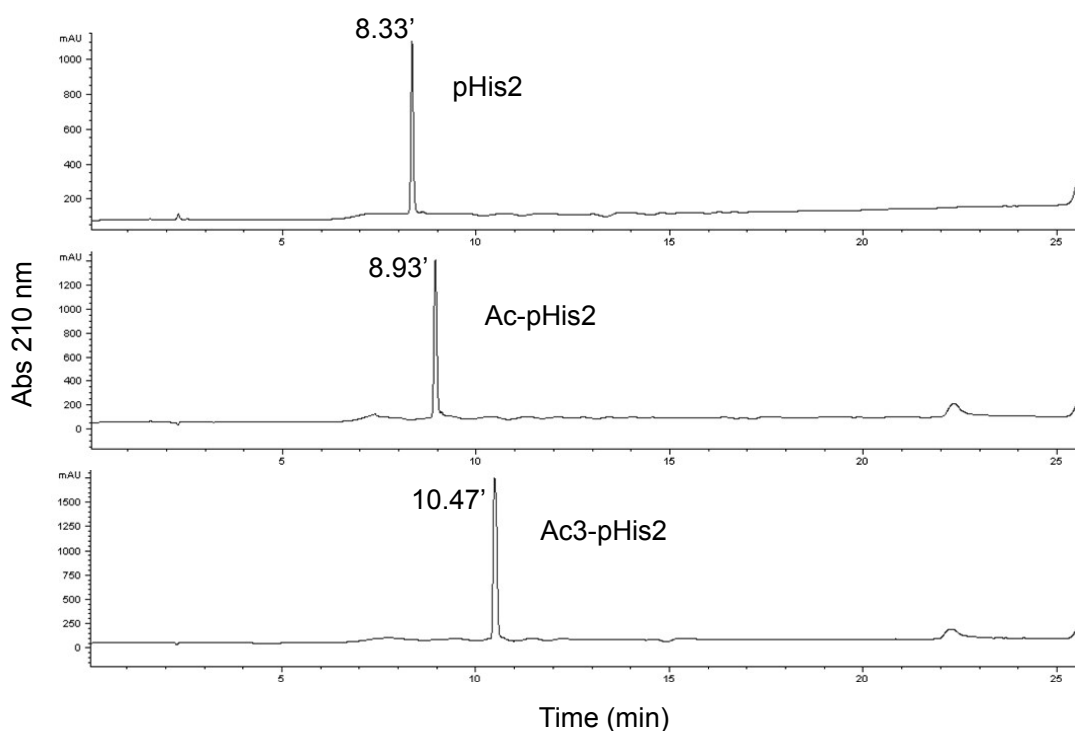

Figure S1: Analytical characterization by RP-HPLC of pHis2, Ac-pHis2 and Ac3-pHis2 peptides. Chromatograms were revealed reading the absorbance at 210 nm.

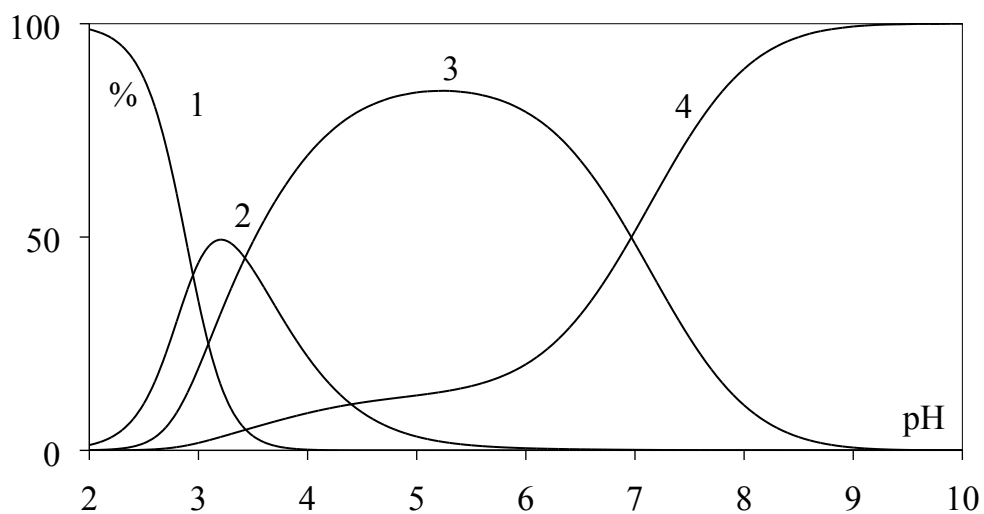

**Fig.S2. Distribution diagram of Ga(III)-His system in 0.1 M NaClO<sub>4</sub> with  $C_{Me} = 2.0 \cdot 10^{-3}$  M and  $C_L = 4.0 \cdot 10^{-3}$  M (1: Ga<sup>3+</sup>; 2: Ga(OH)<sub>2</sub><sup>+</sup>; 3: Ga(OH)<sub>2</sub>His<sup>+</sup>; 4: Ga(OH)<sub>3</sub>).**

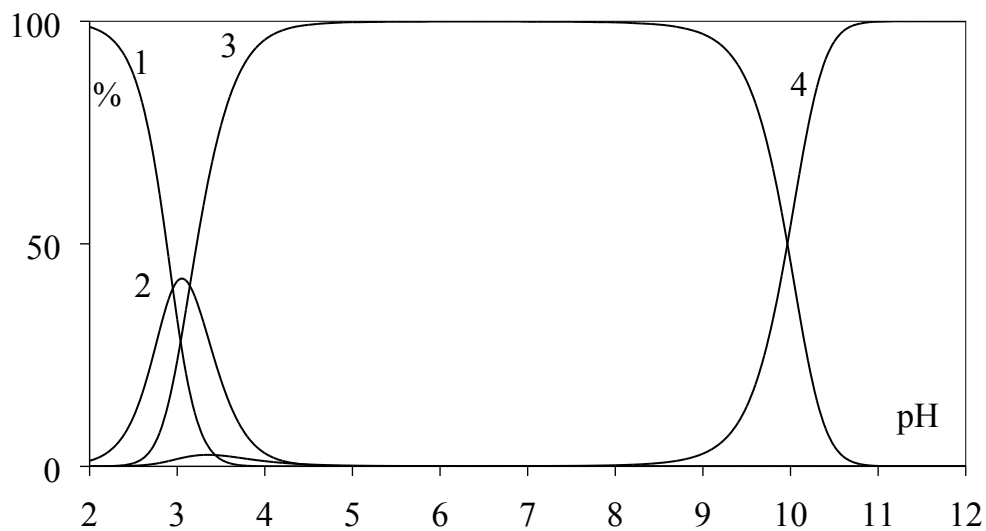

**Fig.S3. Distribution diagram of Ga(III)-pHis2 system in 0.1 M NaClO<sub>4</sub> with  $C_{Me} = 2.0 \cdot 10^{-3}$  M and  $C_L = 4.0 \cdot 10^{-3}$  M (1: Ga<sup>3+</sup>; 2: Ga(OH)<sub>2</sub><sup>+</sup>; 3: Ga(OH)<sub>2</sub>H<sub>3</sub>L<sup>+</sup>; 4: Ga(OH)<sub>3</sub>).**

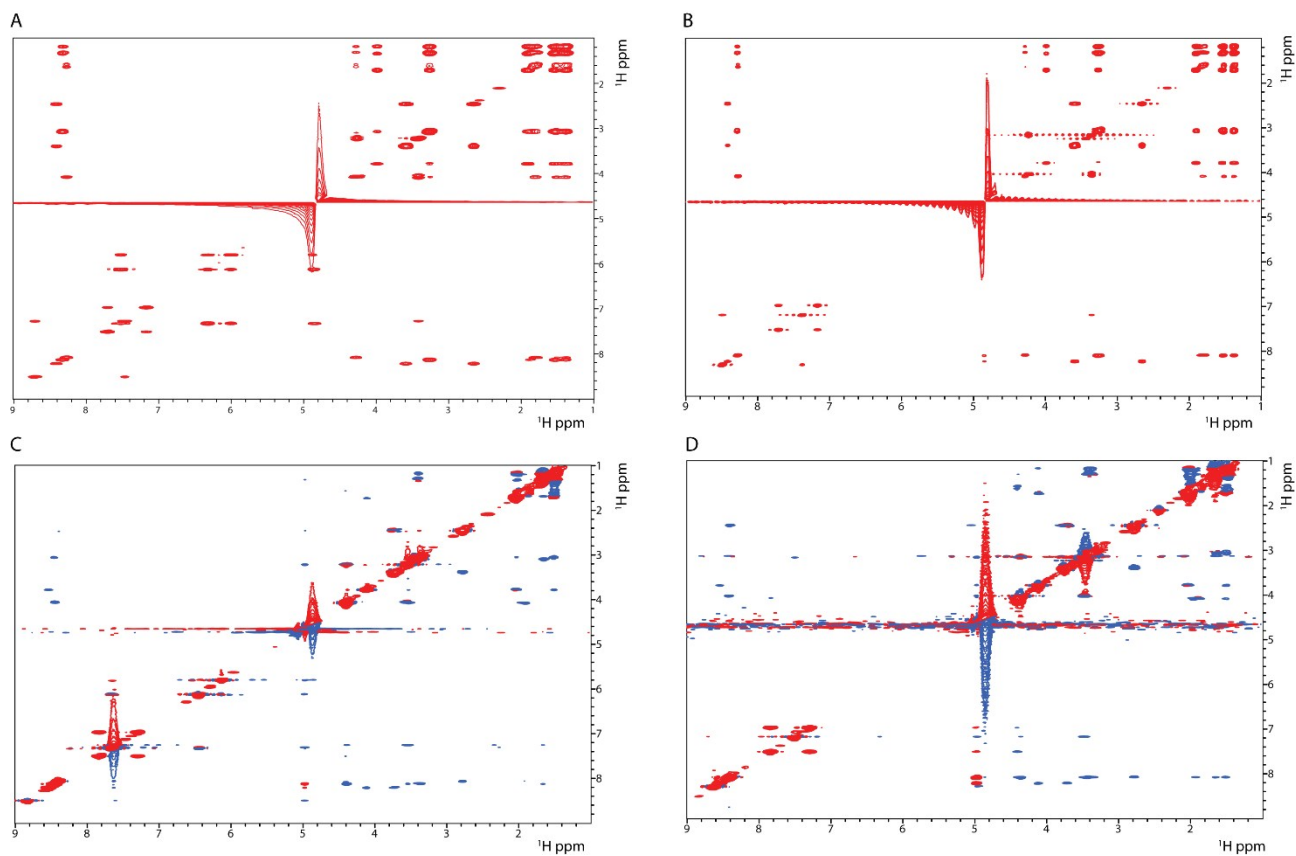

**Fig.S4.**  $^1\text{H}$ - $^1\text{H}$  TOCSY and NOESY spectra of the *fac*- $[\text{Re}(\text{H}_2\text{O})_3(\text{CO})_3]^+$ -pHis2 (A and C, respectively) and of the Ga(III)-pHis2 complexes (B and D).

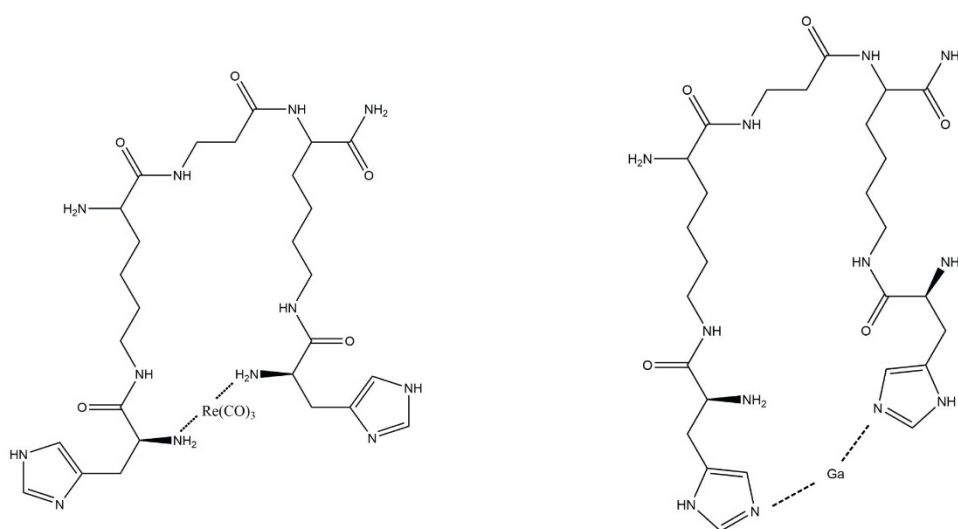

**Fig.S5.** Schematic representation of complex formed by pHis2 upon binding with *fac*- $[\text{Re}(\text{H}_2\text{O})_3(\text{CO})_3]^+$  (left) and with Ga(III) (right).
